# Supplementary material
Source: publisher figshare collection journal article supplement (https://acs.figshare.com/ndownloader/files/4710889)
Supplement: Supplementary file 1 [file 4710889]

# Supplementary Materials

## Self-Assembly of 1-D and 2-D Coordination Polymers with Quinonoid Backbones Featuring Coinage Metals as Nodes

*J. Moussa,<sup>†</sup> C. Guyard-Duhayon,<sup>†</sup> K. Boubekour<sup>†</sup> and H. Amouri\*<sup>†</sup>*

*S.-K. Yip<sup>#</sup> and V. W. W. Yam<sup>#</sup>*

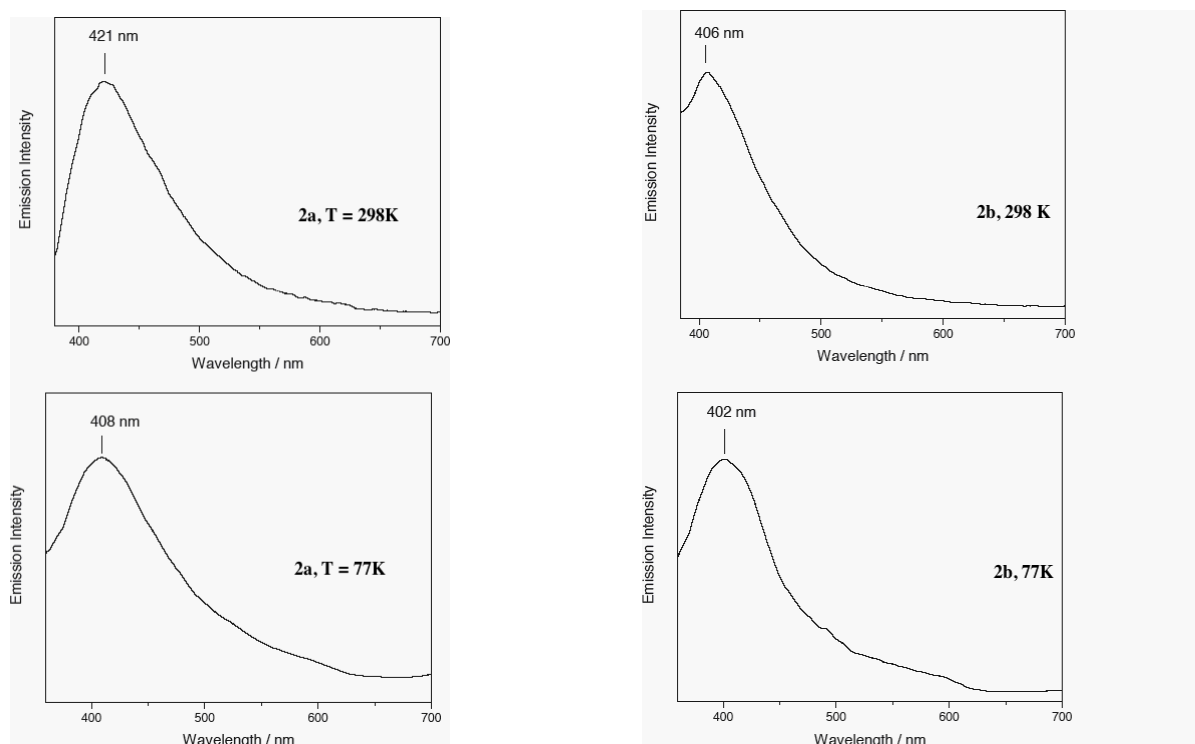

Figure S. Photoluminescence spectra of complexes **2a**, **b** at room temperature and at 77K with  $\lambda$  excitation around 330 to 350 nm.
